# Supplementary material for: A Putative D-Arabinono-1,4-lactone Oxidase, MoAlo1, Is Required for Fungal Growth, Conidiogenesis, and Pathogenicity in Magnaporthe oryzae
Source: MDPI journal article supplement (doi:10.3390/jof8010072), 2022-01-11
Supplement: s1 [file s1]

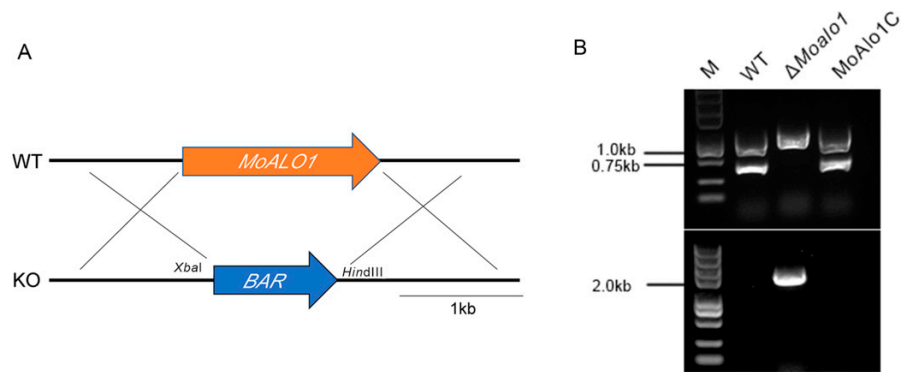

**Figure S1.** Gene deletion of *MoALO1* in *M. oryzae*. (A) Gene replacement of *MoALO1* locus. WT: wild type; KO: knockout. (B) The null mutant was verified by double PCR. *β-tubulin* gene (1.0 kb) were used as a positive control. A distinct band (~0.5 kb) was produced in the wild type Guy11 and the complementary strain MoAlo1C, but  $\Delta Moalo1$  mutant did not. The null mutant was further verified by PCR, the  $\Delta Moalo1$  mutant produced a ~2.0 kb band indicating the target gene deletion cassette.
